# Supplementary material for: How Does Enterprises’ Digital Transformation Impact the Educational Structure of Employees? Evidence from China
Source: MDPI journal article supplement (doi:10.3390/su14159432), 2022-08-01
Supplement: s1 [file s1]

Archive with 1 entries (1 files):
- sustainability-1814174-supplementary.pdf
